# Supplementary material
Source: PubMed Central journal article supplement (PMC7191919)

## Supplement Table of Contents

1. Supplemental Table 1. Performance of Screening Tests Predicting Moderate or Severe Cognitive Impairment
2. Supplemental Table 2. Performance of Trails B and Digit Symbol Predicting Severe Cognitive Impairment Using the Complete Cognitive Battery
3. Supplemental Figure 1. Receive Operator Curve for Prediction of Moderate or Severe Cognitive Impairment

**Supplemental Table 1. Performance of Screening Tests Predicting Moderate or Severe Cognitive Impairment**

| Screening test                         | Cognitive Battery (Gold standard) | N   | n  | AUC  | 95% CI       |
|----------------------------------------|-----------------------------------|-----|----|------|--------------|
| Mini Mental State Examination          | Complete Battery                  | 148 | 92 | 0.68 | (0.60, 0.77) |
| Modified Mini Mental State Examination | Complete Battery                  | 148 | 92 | 0.69 | (0.61, 0.78) |
| Mini-Cog                               | Complete Battery                  | 148 | 92 | 0.66 | (0.58, 0.75) |
| Montreal Cognitive Assessment          | Complete Battery                  | 148 | 92 | 0.73 | (0.65, 0.81) |
| Digit Symbol Substitution              | Battery minus Digit Symbol        | 144 | 78 | 0.66 | (0.58, 0.75) |
| Trail Making Part B (continuous)       | Battery minus Trails B            | 141 | 76 | 0.74 | (0.66, 0.82) |
| Trail Making Part B non-completers     | Battery minus Trails B            | 141 | 76 | 0.64 | (0.59, 0.69) |

Complete battery = Wechsler Memory Scale-III (WMS-III) Word List Learning Subtest,<sup>12</sup> the Wechsler Adult Intelligence Scale-III (WAIS-III) Block Design<sup>12</sup> and Digit Symbol-Coding Subtests,<sup>12</sup> Digit Span (forwards and backwards), and the Trail Making Tests A and B (Trails A and B).<sup>13</sup>

N = total number of participants with sufficient data

n = number of participants with moderate or severe impairment

**Supplemental Table 2. Performance of Trails B and Digit Symbol Predicting Severe Cognitive Impairment Using the Complete Cognitive Battery\***

| <b>Screening test</b>   | <b>Cognitive Battery (Gold standard)</b> | <b>N</b> | <b>n</b> | <b>AUC</b> | <b>95% CI</b> |
|-------------------------|------------------------------------------|----------|----------|------------|---------------|
| Trails B continuous     | Complete Battery                         | 141      | 39       | 0.87       | (0.79, 0.95)  |
| Trails B non-completers | Complete Battery                         | 141      | 39       | 0.79       | (0.71, 0.86)  |
| Digit Symbol            | Complete Battery                         | 144      | 41       | 0.78       | (0.69, 0.87)  |

\*Trails B and Digit Symbol were included in the Comprehensive Battery

**Supplemental Figure 1. Receive Operator Curve for Prediction of Moderate or Severe Cognitive Impairment**

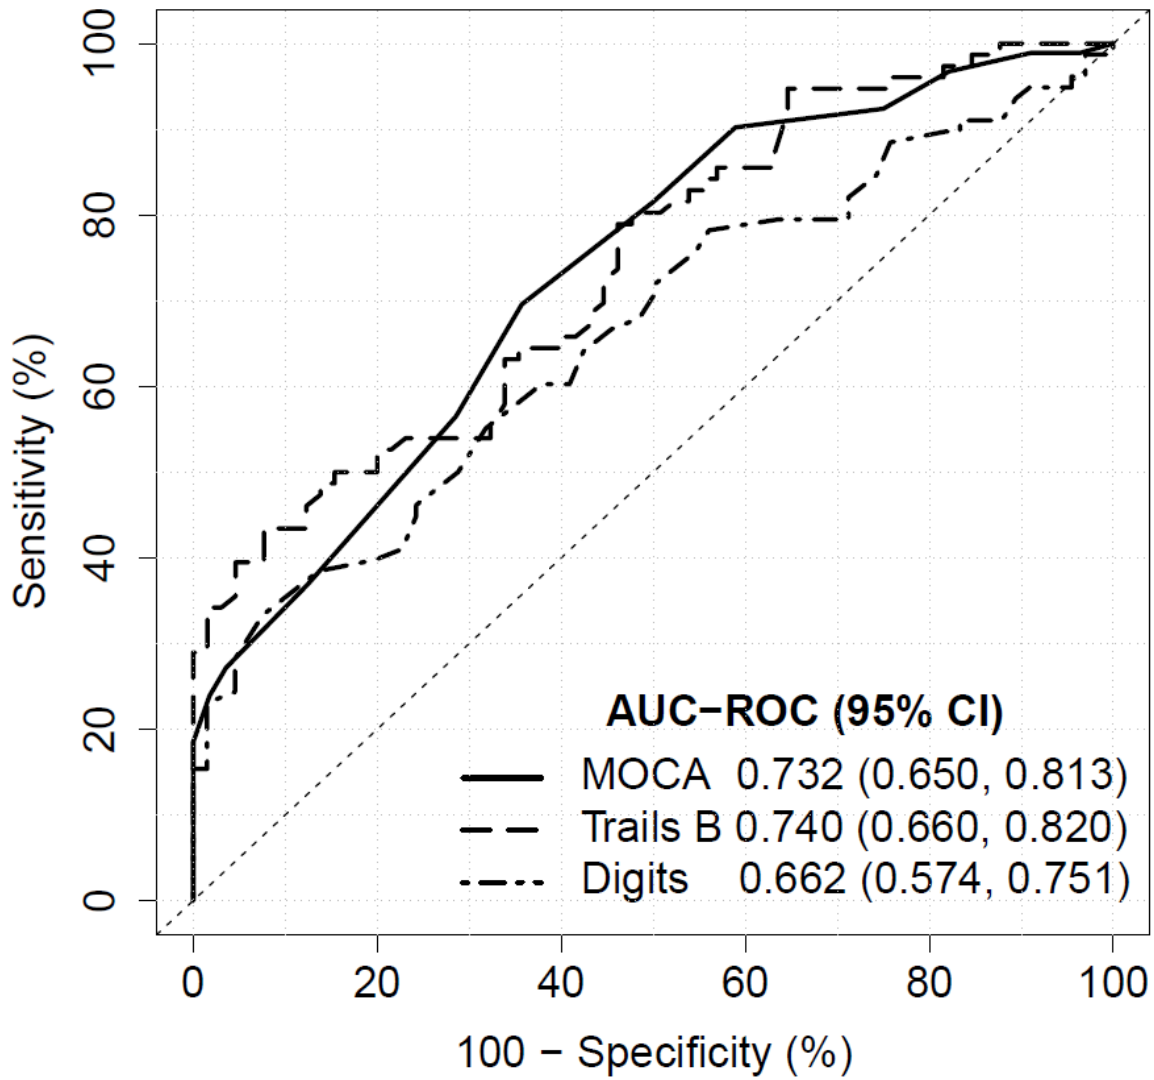

Supplement: ASN.2019100988SupplementaryData.pdf [file ASN.2019100988SupplementaryData.pdf]
